# Supplementary material for: Chemically induced oxidative stress affects ASH neuronal function and behavior in C. elegans
Source: Springer Nature journal article supplement (doi:10.1038/srep38147), 2016-12-06
Supplement: 41598_2016_BFsrep38147_MOESM1_ESM.pdf [file 41598_2016_BFsrep38147_MOESM1_ESM.pdf]

# **Chemically induced oxidative stress affects ASH neuronal function and behavior in *C. elegans***

Eleni Gourgou<sup>1, 2</sup>, Nikos Chronis<sup>1, 3, +</sup>

<sup>1</sup>Department of Mechanical Engineering, University of Michigan, Ann Arbor, MI, USA.

<sup>2</sup>Department of Internal Medicine, Division of Geriatric Medicine, Medical School, University of Michigan, Ann Arbor, MI, USA

<sup>3</sup>Department of Biomedical Engineering, University of Michigan, Ann Arbor, MI, USA

+corresponding author, Nikos Chronis: [chronis@umich.edu](mailto:chronis@umich.edu)

## SUPPL. FIGURE 1

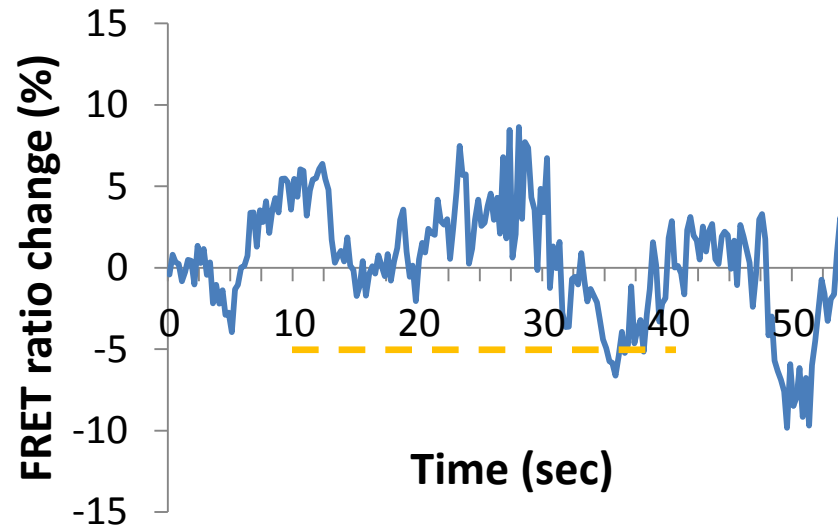

**Suppl. Fig. S1:** Ratiometric calcium transients in the ASH neuron, upon delivery of paraquat (0.1mM PQ), in Day 4 worms. Curve represents an average of 10 recordings. The dashed line represents the presence of the stimulus.

SUPPL. TABLE 1

| METRICS                                 |       | Treatment & Day (d) studied |        |        |       |       |       |           |      |      |
|-----------------------------------------|-------|-----------------------------|--------|--------|-------|-------|-------|-----------|------|------|
|                                         |       | PQ                          |        |        | VitC  |       |       | PQ & VitC |      |      |
|                                         |       | d1                          | d4     | d5     | d1    | d4    | d5    | d1        | d4   | d5   |
| ASH function<br>(calcium imaging)       | peak  | 0.042                       | 0.0003 | 0.0003 | 0.029 | 0.062 | 0.35  | 0.10      | 0.08 | 0.6  |
|                                         | slope | 0.76                        | 0.02   | 0.008  | 0.03  | 0.01  | 0.047 | 0.24      | 0.89 | 0.46 |
| Avoidance Index<br>(glycerol drop test) |       | 0.002                       | 0.03   | 0.028  | 0.001 | 0.24  | 0.28  | 0.002     | 0.50 | 0.91 |
| Response time<br>(octanol avoidance)    |       | 0.001                       | 0.002  | 0.03   | 0.49  | 0.15  | 0.12  | 0.43      | 0.81 | 0.31 |
| Locomotion parameters<br>-velocity      |       | 0.87                        | 0.16   | 0.0001 | 0.63  | 0.43  | 0.30  | 0.45      | 0.47 | 0.05 |
| -bending amplitude                      |       | 0.63                        | 0.28   | 0.16   | 0.08  | 0.058 | 0.05  | 0.62      | 0.59 | 0.28 |

**Suppl. Table S1:** Summary of p-values (Student's *t*-test) for each treatment and the examined metrics, compared to untreated (control) worms for Day 1, 4 and 5. Values have been rounded to the nearest significant decimal. Uncolored cells indicate  $p > 0.05$  (non-significant difference), yellow cells indicate  $p < 0.05$ , green cells indicate  $p < 0.01$ , and blue cells indicate  $p < 0.001$ .

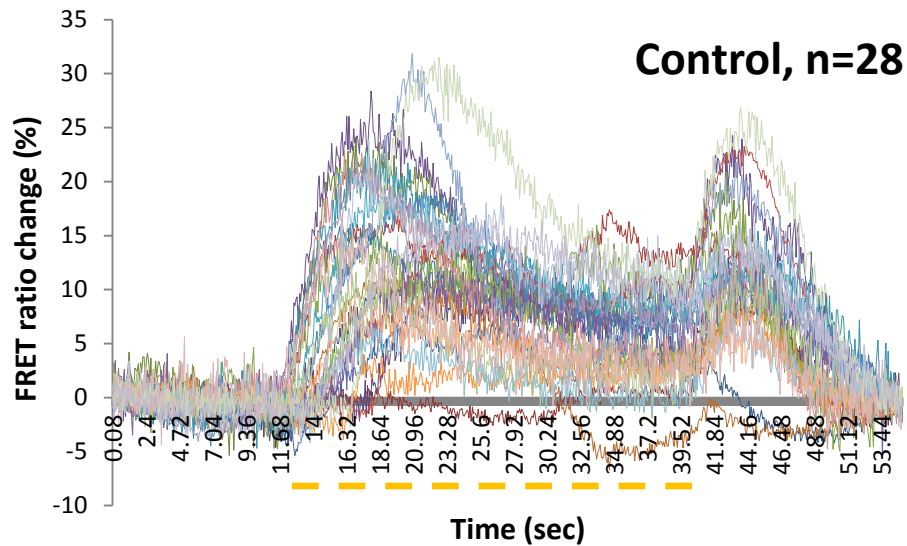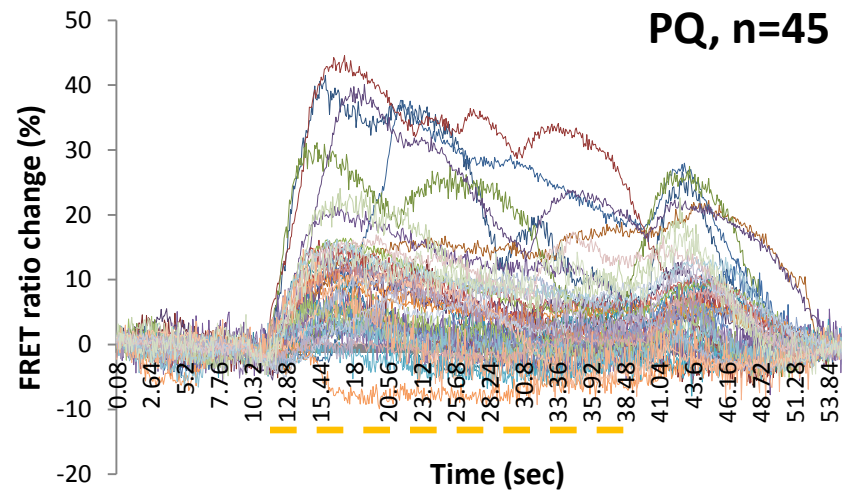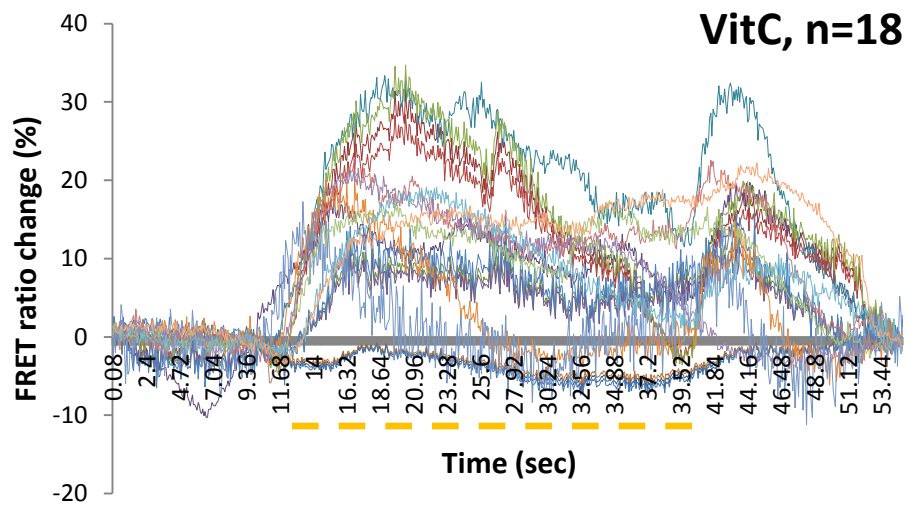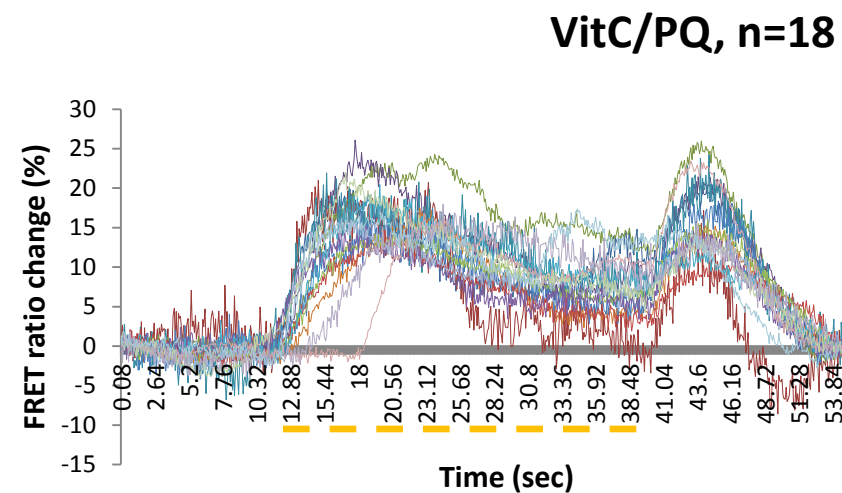

**Control, n=17**

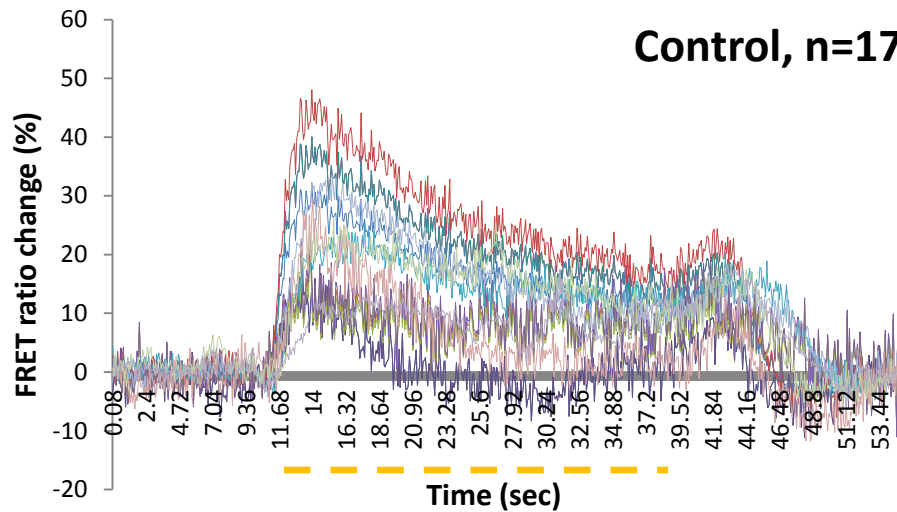

**PQ, n=23**

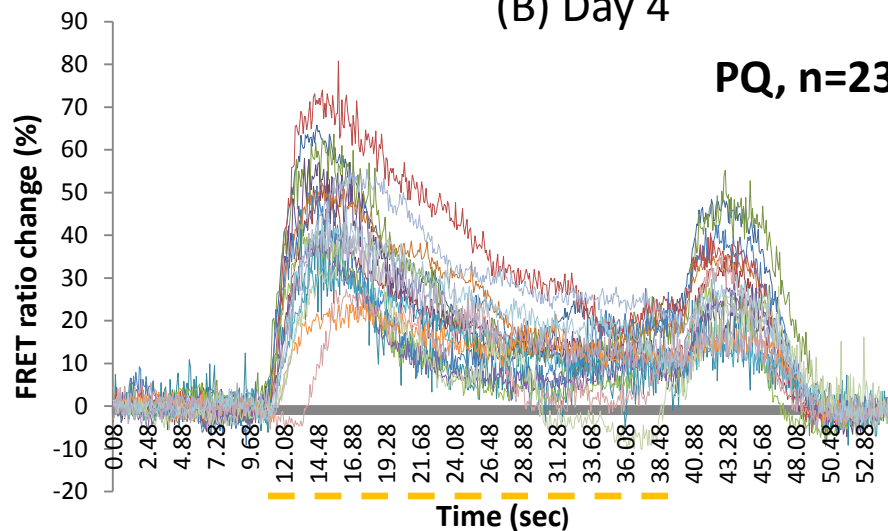

**VitC, n=17**

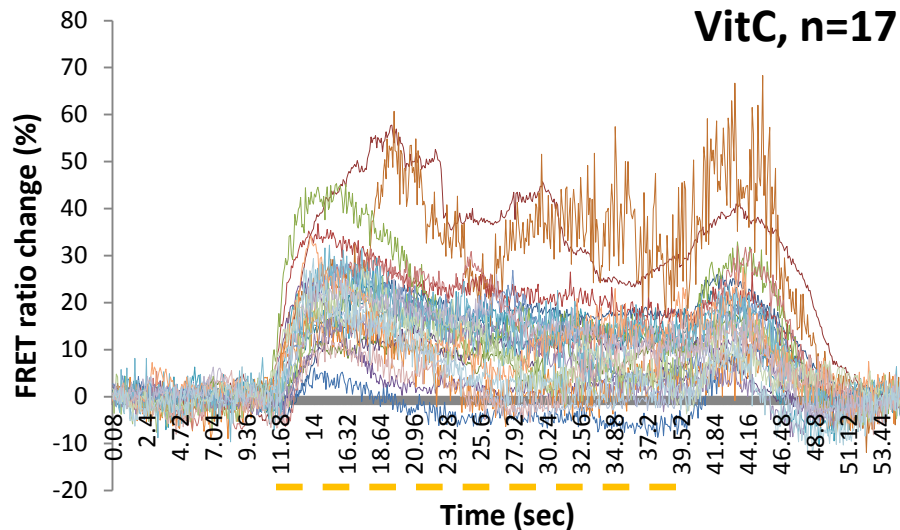

**VitC/PQ, n=18**

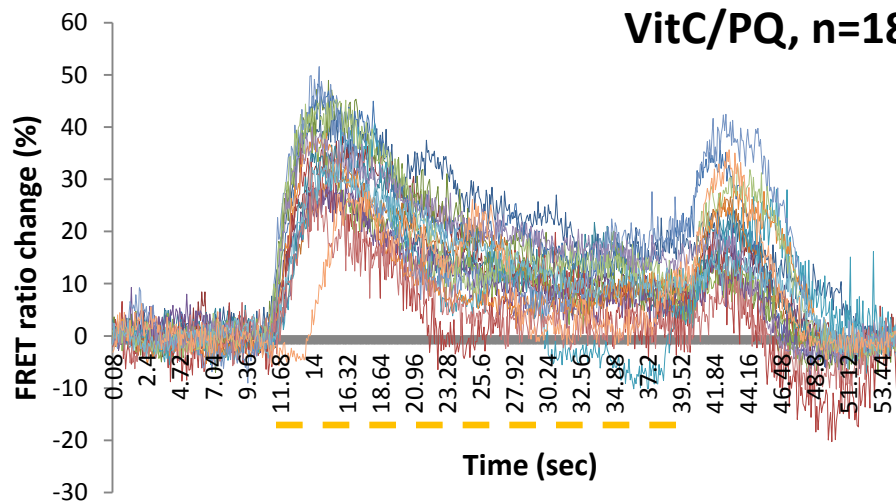

SUPPL. FIGURE 2  
(C) Day 5

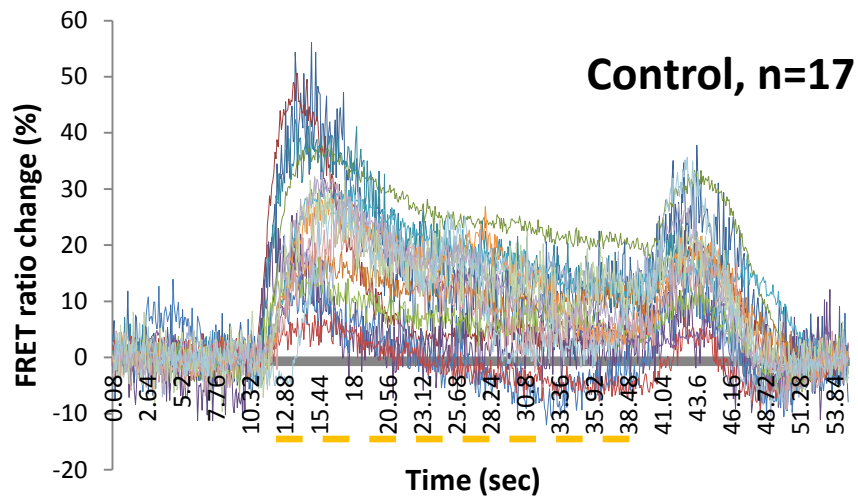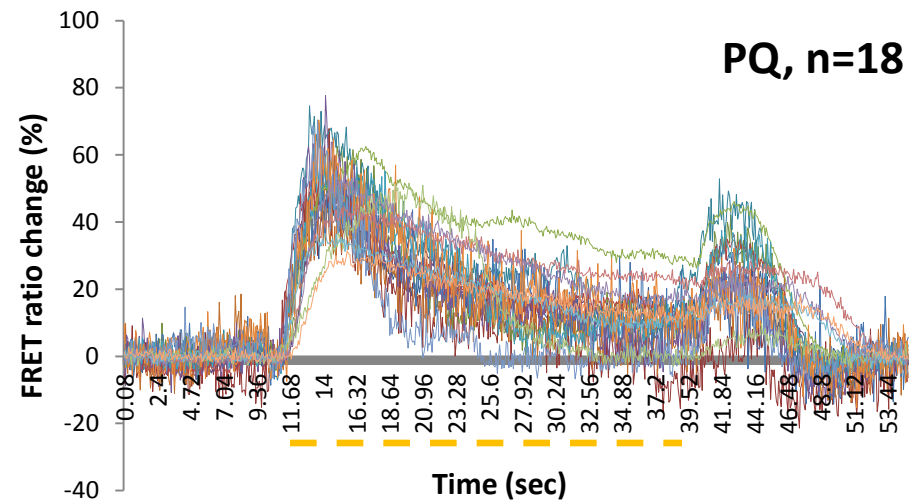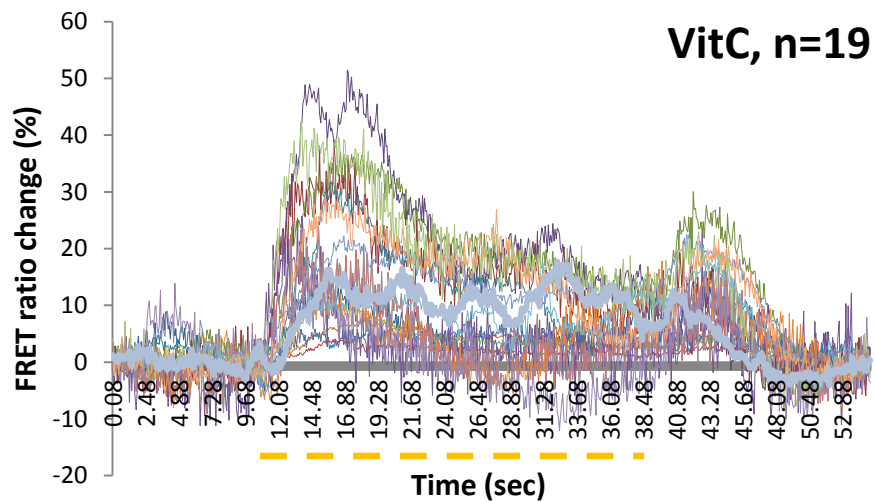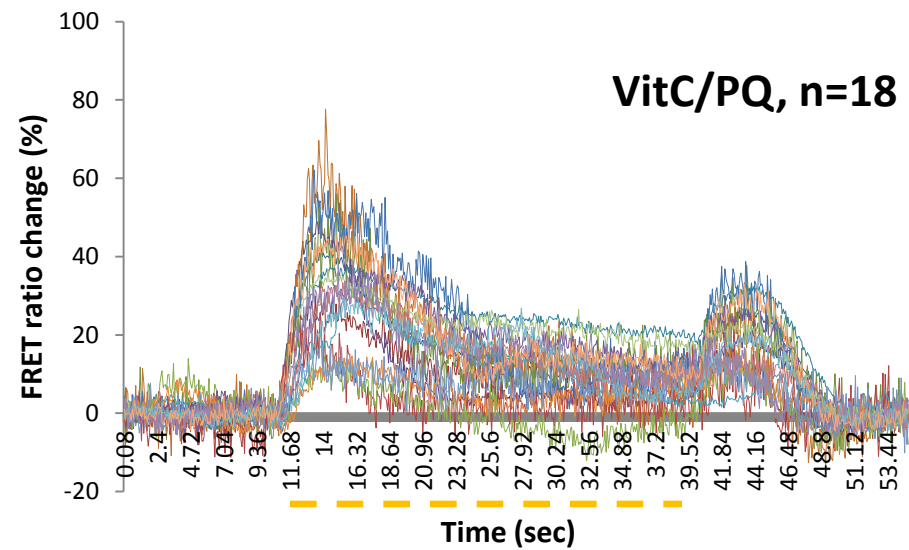

**Suppl. Figure S2:** Individual ratiometric calcium transients of the ASH neuron, upon delivery of hyperosmotic stimulus (1M glycerol), in worms of four studied groups (Control: untreated animals, VitC: worms grown at the presence of 1mM vitamin C, PQ: worms grown at the presence of 0.1mM PQ, VitC/PQ: worms grown at the simultaneous presence of both 1mM vitamin C and 0.1mM PQ). (A) Day 1 recordings, (B) Day 4 recordings, (C) Day 5 recordings (L4 animals are considered as Day 0 worms), n= number of worms tested. The dashed line represents the presence of the stimulus.

SUPPL. TABLE 2, Octanol Response Time

|      | RESPONSE TIME (sec) |      |       |        |  |         |      |       |        |  |         |    |      |        |
|------|---------------------|------|-------|--------|--|---------|------|-------|--------|--|---------|----|------|--------|
|      | Day1                |      |       |        |  | Day4    |      |       |        |  | Day5    |    |      |        |
| Worm | Control             | PQ   | VitC  | VitCPQ |  | Control | PQ   | VitC  | VitCPQ |  | Control | PQ | VitC | VitCPQ |
| 1    | 12.83               | 6.75 | 7.5   | 9.82   |  |         | 3.48 | 10.57 | 11.67  |  | 13      | 4  | 8    | 9      |
| 2    | 15.86               | 5.31 | 13.12 | 10.11  |  | 15.72   | 3.84 | 10.94 |        |  | 6       | 5  | 5    | 8      |
| 3    | 14.15               | 2.7  | 8.58  | 6.7    |  | 16.84   | 6.22 | 10.17 | 15.72  |  | 7       | 7  | 5    | 5      |
| 4    | 12.95               | 5.4  | 12.75 | 13.47  |  | 10.42   | 7.84 | 6.58  | 13.42  |  | 7       | 2  | 6    | 8      |
| 5    | 8.75                | 6.7  | 13.8  | 12.54  |  | 7.55    | 7.58 | 8.17  | 9.54   |  | 12      | 7  | 5    | 5      |
| 6    | 18.7                | 7.45 | 13.61 | 14.13  |  | 8.48    | 6.42 | 11.46 | 12.27  |  | 8       | 4  | 6    | 7      |
| 7    | 12.9                | 3.46 | 11.74 | 16.03  |  | 11.78   | 4.41 | 8.22  | 14.52  |  | 7       | 2  | 11   | 9      |
| 8    | 7.71                | 8.25 | 5.89  | 5.43   |  | 14.83   | 3.27 | 8.37  | 10.74  |  | 8       | 4  | 7    | 5      |
| 9    | 5.27                | 7.69 | 6.6   | 7.65   |  | 17.75   | 7.35 | 11.46 | 6.45   |  | 9       | 5  | 6    | 8      |
| 10   | 11.82               | 4.28 | 14.23 | 8.71   |  | 9.54    | 4.52 | 9.98  | 8.85   |  | 7       | 5  | 5    | 5      |
| 11   | 16.84               | 3.81 | 7.61  | 11.23  |  | 8.67    | 2.75 | 11.22 | 7.42   |  | 11      | 4  | 12   | 11     |
| 12   | 15.14               | 6.41 | 13.64 | 5.1    |  | 5.39    | 7.15 | 9.98  | 14.52  |  | 13      | 6  | 6    | 5      |
| 13   | 11.91               | 5.68 | 14.2  | 14.46  |  | 10.79   | 6.74 | 7.21  | 15.6   |  | 6       | 4  | 11   | 7      |
| 14   | 9.71                | 8.54 | 12.73 | 11.65  |  | 12.85   | 8.61 | 12.52 | 7.51   |  | 7       | 5  | 5    | 8      |
| 15   | 17.9                | 2.56 | 12.61 | 15.23  |  | 12.7    | 5.33 | 7.31  | 14.46  |  | 7       | 7  | 6    | 8      |
| 16   | 11.8                | 7.22 | 4.98  | 15.14  |  | 14.7    | 6.52 | 9.48  | 8.82   |  | 12      | 2  | 10   | 9      |
| 17   | 8.8                 | 5.7  | 11.8  | 6.33   |  | 10.2    | 2.38 | 8.33  | 12.3   |  | 8       | 2  | 3    | 5      |
| 18   | 4.1                 | 4.78 | 12.7  | 6.65   |  | 8.3     | 8.44 | 10.29 | 6.39   |  | 7       | 7  | 4    | 12     |
| 19   | 12.8                | 6.64 | 9.64  | 9.56   |  | 12.05   | 6.1  | 15.29 | 11.4   |  | 7       | 3  | 8    | 8      |
| 20   | 12.1                | 5.71 | 8.8   | 11.74  |  | 11.01   | 4.7  | 9.17  | 11.15  |  | 12      | 5  | 3    | 7      |
|      |                     |      |       |        |  |         |      |       |        |  |         |    |      |        |

**Suppl. Table S2:** Response time to 30% octanol in worms of four studied groups (Control: untreated animals, VitC: worms grown at the presence of 1 mM vitamin C, PQ: worms grown at the presence of 0.1mM PQ, VitC/PQ: worms grown at the simultaneous presence of 1 mM vitamin C and 0.1 mM PQ), for three different ages (L4 animals are considered as Day 0 worms). Response time in sec, 20 worms assayed from each studied group.



SUPPL. TABLE 3, Glycerol Avoidance Index, (A) Day1

| Worm | Day1    |   |   |   |   |      |    |   |   |   |   |      |      |   |   |   |   |      |        |   |   |   |   |      |  |
|------|---------|---|---|---|---|------|----|---|---|---|---|------|------|---|---|---|---|------|--------|---|---|---|---|------|--|
|      | Control |   |   |   |   | A.I. | PQ |   |   |   |   | A.I. | VitC |   |   |   |   | A.I. | VitCPQ |   |   |   |   | A.I. |  |
| 1    | Y       | Y | N | Y | N | 0.6  | Y  | Y | Y | N | Y | 0.8  | Y    | Y | Y | Y | Y | 1    | Y      | Y | Y | Y | Y | 1    |  |
| 2    | Y       | N | Y | N | Y | 0.6  | Y  | Y | Y | N | Y | 0.8  | Y    | Y | N | Y | Y | 0.8  | N      | Y | Y | N | Y | 0.6  |  |
| 3    | Y       | Y | Y | Y | N | 0.8  | N  | Y | Y | Y | Y | 0.8  | Y    | N | Y | N | Y | 0.6  | Y      | Y | N | Y | Y | 0.8  |  |
| 4    | N       | Y | N | N | N | 0.2  | Y  | Y | N | Y | Y | 0.8  | Y    | Y | Y | Y | N | 0.8  | Y      | Y | Y | N | Y | 0.8  |  |
| 5    | N       | N | N | Y | Y | 0.4  | N  | Y | Y | Y | Y | 0.8  | Y    | Y | N | N | Y | 0.6  | Y      | N | Y | Y | N | 0.6  |  |
| 6    | N       | N | Y | N | Y | 0.4  | Y  | Y | Y | Y | N | 0.8  | N    | Y | Y | Y | Y | 0.8  | Y      | Y | Y | Y | Y | 1    |  |
| 7    | N       | Y | Y | Y | N | 0.6  | Y  | N | Y | N | Y | 0.6  | Y    | Y | Y | Y | N | 0.8  | N      | Y | Y | N | Y | 0.6  |  |
| 8    | Y       | Y | N | Y | Y | 0.8  | Y  | Y | Y | Y | Y | 1    | Y    | N | Y | Y | Y | 0.8  | Y      | Y | Y | Y | Y | 1    |  |
| 9    | N       | N | Y | N | N | 0.2  | Y  | N | Y | Y | Y | 0.8  | N    | Y | Y | Y | Y | 0.8  | N      | Y | Y | Y | N | 0.8  |  |
| 10   | Y       | N | N | Y | N | 0.4  | N  | Y | Y | Y | N | 0.6  | Y    | Y | N | Y | Y | 0.8  | Y      | Y | Y | N | Y | 0.8  |  |
| 11   | N       | Y | Y | Y | N | 0.6  | Y  | Y | N | Y | Y | 0.8  | N    | Y | Y | Y | Y | 0.8  | Y      | N | Y | Y | N | 0.6  |  |
| 12   | Y       | N | N | Y | N | 0.4  | Y  | N | Y | N | Y | 0.6  | Y    | Y | N | Y | Y | 0.8  | Y      | Y | Y | Y | Y | 1    |  |
| 13   | Y       | Y | Y | Y | N | 0.8  | Y  | Y | Y | Y | Y | 1    | Y    | Y | N | N | Y | 0.6  | N      | Y | Y | N | Y | 0.6  |  |
| 14   | Y       | Y | N | Y | N | 0.6  | N  | Y | Y | Y | Y | 0.8  | Y    | Y | Y | Y | N | 0.8  | N      | Y | Y | Y | N | 0.8  |  |
| 15   | Y       | Y | N | Y | Y | 0.8  | Y  | Y | Y | N | Y | 0.8  | Y    | Y | Y | Y | N | 0.8  | N      | Y | Y | N | Y | 0.6  |  |
| 16   | N       | Y | N | N | N | 0.2  | Y  | N | Y | Y | Y | 0.8  | Y    | N | Y | Y | Y | 0.8  | Y      | Y | N | Y | Y | 0.8  |  |
| 17   | N       | N | Y | N | N | 0.2  | N  | Y | Y | Y | N | 0.6  | Y    | Y | N | Y | Y | 0.8  | Y      | Y | Y | N | Y | 0.8  |  |
| 18   | Y       | N | Y | N | Y | 0.6  | N  | Y | Y | Y | Y | 0.8  | Y    | N | Y | Y | Y | 0.8  | Y      | Y | Y | Y | Y | 1    |  |
| 19   | N       | N | N | Y | Y | 0.4  | Y  | Y | Y | Y | N | 0.8  | Y    | N | Y | N | Y | 0.6  | Y      | Y | Y | Y | Y | 1    |  |
| 20   | N       | N | Y | N | Y | 0.4  | Y  | Y | Y | N | Y | 0.8  | Y    | Y | Y | Y | Y | 1    | Y      | Y | Y | N | Y | 0.8  |  |
|      |         |   |   |   |   |      |    |   |   |   |   |      |      |   |   |   |   |      |        |   |   |   |   |      |  |

**Suppl. Table S3, (A):** Avoidance index to 0.5M glycerol drop test in worms of four studied groups (Control: untreated animals, VitC: worms grown at the presence of 1mM vitamin C, PQ: worms grown at the presence of 0.1mM PQ, VitC/PQ: worms grown at the simultaneous presence of 1 mM vitamin C and 0.1mM PQ), for Day 1 worms (L4 animals are considered as Day 0 worms). 20 worms assayed, 5 trials/worm. Y: positive response (avoidance), N: negative response (no avoidance).

SUPPL. TABLE 3, Glycerol Avoidance Index, (B) Day4

| Worm | Day4    |   |   |   |   |      |    |   |   |   |   |      |      |   |   |   |   |      |        |   |   |   |   |      |  |
|------|---------|---|---|---|---|------|----|---|---|---|---|------|------|---|---|---|---|------|--------|---|---|---|---|------|--|
|      | Control |   |   |   |   | A.I. | PQ |   |   |   |   | A.I. | VitC |   |   |   |   | A.I. | VitCPQ |   |   |   |   | A.I. |  |
| 1    | Y       | Y | N | N | Y | 0.6  | Y  | Y | Y | Y | N | 0.8  | N    | Y | Y | N | Y | 0.6  | Y      | N | N | Y | Y | 0.6  |  |
| 2    | Y       | N | Y | Y | N | 0.6  | Y  | N | Y | Y | Y | 0.8  | C    | N | N | Y | Y | 0.6  | N      | Y | Y | Y | N | 0.6  |  |
| 3    | N       | Y | N | N | Y | 0.4  | N  | Y | Y | Y | Y | 0.8  | N    | Y | Y | Y | N | 0.6  | N      | N | N | Y | Y | 0.4  |  |
| 4    | N       | Y | Y | Y | Y | 0.8  | Y  | Y | N | N | Y | 0.6  | N    | Y | N | N | Y | 0.4  | C      | Y | N | Y | N | 0.6  |  |
| 5    | N       | N | Y | Y | N | 0.4  | Y  | Y | Y | Y | N | 0.8  | Y    | N | Y | Y | N | 0.6  | Y      | N | Y | Y | N | 0.6  |  |
| 6    | Y       | Y | Y | N | Y | 0.8  | Y  | N | N | Y | Y | 0.6  | N    | N | N | N | Y | 0.2  | Y      | Y | N | N | Y | 0.6  |  |
| 7    | N       | N | Y | Y | Y | 0.6  | Y  | Y | Y | N | Y | 0.8  | N    | Y | Y | N | Y | 0.6  | N      | N | Y | Y | N | 0.4  |  |
| 8    | Y       | Y | N | Y | Y | 0.8  | Y  | N |   | Y | Y | 0.75 | Y    | N | N | Y | N | 0.4  | N      | Y | Y | Y | N | 0.6  |  |
| 9    | N       | N | Y |   |   | 0.33 | Y  | Y | N | N | Y | 0.6  | N    | Y | N | N | Y | 0.4  | Y      | N | N | Y | Y | 0.6  |  |
| 10   | Y       | Y | N |   |   | 0.66 | Y  | Y | Y | Y | N | 0.8  | N    | Y | N | Y | Y | 0.6  | N      | N | Y | Y | N | 0.4  |  |
| 11   | N       | Y |   |   |   | 0.5  | N  | Y | Y | Y | Y | 0.8  | N    | Y | Y | N | Y | 0.6  | Y      | N | Y | N | Y | 0.6  |  |
| 12   | Y       | Y | N | Y | N | 0.6  | Y  | N | Y | Y | Y | 0.8  | N    | Y | Y | Y | N | 0.6  | Y      | N | Y | N | N | 0.4  |  |
| 13   | N       | N | Y | Y | Y | 0.6  | N  | Y | Y | Y | Y | 0.8  | Y    | N | Y | Y | N | 0.6  | Y      | Y | Y | N | N | 0.6  |  |
| 14   | Y       | Y | N | Y | Y | 0.8  | Y  | Y | N | N | Y | 0.6  | Y    | N | N | Y | N | 0.4  | Y      | N | Y | Y | N | 0.6  |  |
| 15   | N       | Y | Y | Y | N | 0.6  | Y  | Y | Y | N | Y | 0.8  | N    | Y | Y | N | Y | 0.6  | N      | N | N | Y | Y | 0.4  |  |
| 16   | Y       | Y | N | N | N | 0.4  | Y  | N | N | Y | Y | 0.6  | N    | N | Y | N | N | 0.2  | Y      | Y | N | N | Y | 0.6  |  |
| 17   | N       | N | Y | Y | N | 0.4  | Y  | Y | Y | Y | N | 0.8  | N    | Y | Y | N | Y | 0.6  | Y      | N | N | Y | Y | 0.6  |  |
| 18   | Y       | Y | Y | N | Y | 0.8  | Y  | Y | Y |   | N | 0.75 | Y    | N | N | Y | N | 0.4  | Y      | N | Y | Y | N | 0.6  |  |
| 19   | Y       | N | Y | N | N | 0.4  |    |   |   |   |   | 0.6  |      |   |   |   |   | 0.6  | Y      | N | N | Y | N | 0.4  |  |
| 20   | N       | Y | N | Y | Y | 0.6  | Y  | Y | Y | Y | N | 0.8  | Y    | Y | N | N | N | 0.4  | Y      | N | N | Y | Y | 0.6  |  |
|      |         |   |   |   |   |      |    |   |   |   |   |      |      |   |   |   |   |      |        |   |   |   |   |      |  |

**Suppl. Table S3, (B):** Avoidance index to 0.5M glycerol drop test in worms of four studied groups (Control: untreated animals, VitC: worms grown at the presence of 1mM vitamin C, PQ: worms grown in the presence of 0.1 mM PQ, VitC/PQ: worms grown in the simultaneous presence of 1 mM vitamin C and 0.1mM PQ), for Day 4 worms (L4 animals are considered as Day 0 worms). 20 worms assayed, 5 trials/worm. Y: positive response (avoidance), N: negative response (no avoidance).

SUPPL. TABLE 3, Glycerol Avoidance Index, (C) Day5

| Worm | Day5    |   |   |   |   |      |    |   |   |   |   |      |      |   |   |   |   |      |        |   |   |   |   |      |
|------|---------|---|---|---|---|------|----|---|---|---|---|------|------|---|---|---|---|------|--------|---|---|---|---|------|
|      | Control |   |   |   |   | A.I. | PQ |   |   |   |   | A.I. | VitC |   |   |   |   | A.I. | VitCPQ |   |   |   |   | A.I. |
| 1    | N       | Y | N | Y | Y | 0.6  | Y  | Y | N | Y | Y | 0.8  | Y    | N | Y | Y | Y | 0.8  | Y      | N | Y | N | Y | 0.6  |
| 2    | N       | Y | Y | N | N | 0.4  | Y  | N | Y | N | N | 0.4  | N    | Y | N | N | Y | 0.4  | N      | Y | N | N | N | 0.2  |
| 3    | Y       | N | N | Y | N | 0.4  | N  | Y | N | Y | Y | 0.6  | Y    | Y | Y | Y | N | 0.8  | N      | Y | N | Y | Y | 0.6  |
| 4    | N       | Y | Y | N | Y | 0.6  | Y  | Y | Y | Y | N | 0.8  | Y    | N | N | N | Y | 0.4  | Y      | N | Y | Y | Y | 0.8  |
| 5    | N       | N | Y | N | N | 0.2  | N  | N | Y | Y | Y | 0.6  | N    | Y | Y | Y | N | 0.6  | N      | Y | N | N | N | 0.2  |
| 6    | Y       | Y | N | Y | Y | 0.8  | N  | Y | N | Y | N | 0.4  | Y    | N | N | Y | Y | 0.6  | N      | N | Y | N | Y | 0.4  |
| 7    | N       | N | Y | N | N | 0.2  | Y  | N | Y | Y | Y | 0.8  | N    | Y | Y | N | Y | 0.6  | Y      | N | Y | Y | Y | 0.8  |
| 8    | Y       | N | Y | Y | Y | 0.8  | N  | Y | N | N | N | 0.2  | Y    | Y | Y | Y | N | 0.8  | N      | Y | Y | N | N | 0.4  |
| 9    | N       | Y | N | Y | Y | 0.6  | Y  | N | Y | Y | Y | 0.8  | N    | N | Y | N | Y | 0.4  | N      | Y | N | Y | Y | 0.6  |
| 10   | N       | Y | Y | N | N | 0.4  | N  | Y | Y | N | Y | 0.8  | Y    | N | N | Y | Y | 0.6  | N      | Y | Y | N | N | 0.4  |
| 11   | Y       | N | N | Y | N | 0.4  | Y  | N | Y | Y | Y | 0.8  | N    | Y | Y | Y | N | 0.6  | Y      | Y | Y | Y | N | 0.8  |
| 12   | Y       | Y | Y | N | N | 0.6  | N  | Y | Y | N | N | 0.4  | N    | Y | Y | N | N | 0.4  | N      | Y | Y | Y | N | 0.6  |
| 13   | N       | Y | N | Y | Y | 0.6  | N  | Y | Y | Y | N | 0.6  | Y    | N | Y | Y | Y | 0.8  | Y      | N | N | N | Y | 0.4  |
| 14   | N       | Y | Y | N | N | 0.4  | Y  | Y | Y | Y | N | 0.8  | N    | N | N | Y | N | 0.4  | N      | Y | N | Y | Y | 0.6  |
| 15   | Y       | N | N | Y | N | 0.4  | N  | Y | N | Y | Y | 0.6  | Y    | Y | Y | Y | N | 0.8  | Y      | N | N | N | N | 0.2  |
| 16   | Y       | N | Y | N | Y | 0.6  | N  | Y | Y | N | N | 0.4  | N    | Y | Y | N | N | 0.4  | Y      | Y | Y | N | N | 0.6  |
| 17   | N       | N | N | N | Y | 0.2  | Y  | N | Y | Y | Y | 0.8  | N    | Y | N | Y | Y | 0.6  | N      | Y | N | Y | Y | 0.6  |
| 18   | N       | Y | Y | Y | Y | 0.8  | N  | Y | N | N | N | 0.2  | N    | Y | Y | Y | N | 0.6  | Y      | N | Y | N | N | 0.4  |
| 19   | N       | N | Y | N | N | 0.2  | Y  | Y | Y | N | Y | 0.8  | N    | Y | N | Y | Y | 0.6  | Y      | Y | Y | Y | N | 0.8  |
| 20   | Y       | Y | N | Y | Y | 0.8  | Y  | N | Y | Y | Y | 0.8  | Y    | Y | Y | Y | N | 0.8  | N      | Y | N | N | N | 0.2  |

**Suppl. Table S3, (C):** Avoidance index to 0.5M glycerol drop test in worms of four studied groups (Control: untreated animals, VitC: worms grown at the presence of 1mM vitamin C, PQ: worms grown in the presence of 0.1mM paraquat, VitC/PQ: worms grown in the simultaneous presence of both 1mM vitamin C and 0.1mM paraquat), for Day 5 worms (L4 animals are considered as Day 0 worms). 20 worms assayed, 5trials/worm. Y: positive response (avoidance), N: negative response (no avoidance).

SUPPL. TABLE 4, Locomotion Parameters Data, (A) Velocity

| VELOCITY (um/sec) |        |       |        |         |       |        |        |         |        |       |        |
|-------------------|--------|-------|--------|---------|-------|--------|--------|---------|--------|-------|--------|
| Day1              |        |       |        | Day4    |       |        |        | Day5    |        |       |        |
| Control           | VitC   | PQ    | VitCPQ | Control | VitC  | PQ     | VitCPQ | Control | VitC   | PQ    | VitCPQ |
| 71.1              | 100.76 | 45.96 | 65     | 78.78   | 96.98 | 130.1  | 27.7   | 71.5    | 37.88  | 26.16 | 52.64  |
| 83                | 13.06  | 66    | 81.54  | 84.5    | 62.4  | 119.36 | 58.56  | 68.18   | 101.78 | 39.64 | 46.14  |
| 81.76             | 78.76  | 89.42 | 73.82  | 39.2    | 57.52 | 83.2   | 52.94  | 43.68   | 47.5   | 53.06 | 56.62  |
| 57.78             | 99.3   | 80.74 | 36.74  | 74.86   | 63.26 | 68.52  | 75.72  | 87.16   | 56     | 57.74 | 55.6   |
| 71.82             | 8.36   | 57.68 | 84.88  | 61.84   | 92.36 | 51.32  | 27.08  | 101.18  | 71.82  | 36.12 | 58.02  |
| 75.24             | 102.62 | 98.5  | 140.74 | 54.94   | 57.26 | 69.6   | 11.54  | 85.28   | 86.24  | 36.76 | 45.14  |
| 70.68             | 50.88  | 81.92 | 66.84  | 80.3    | 90.7  | 97.78  | 73.44  | 77.88   | 87.3   | 39.78 | 49.8   |
| 70.4              | 80.96  | 88.26 | 79.12  | 91.82   | 60.38 | 86.4   | 96.38  | 137.18  | 69.98  | 50.66 | 40.28  |
| 91.8              | 48.5   | 71.28 | 65.9   | 73.34   | 84.84 | 53.94  | 103.88 | 105.48  | 65.41  | 68.42 | 53.18  |
| 74.58             | 15.67  | 80.28 | 80.54  | 127.14  | 93.86 | 87.24  | 81.44  | 56.06   | 70.82  | 53.18 | 56.03  |
| 48.44             | 10.36  | 100.4 | 85.8   | 73.7    | 94.45 | 71.14  | 93.66  | 111.78  | 61.89  | 31.68 | 58.21  |
| 70.26             | 100.4  | 75.2  | 28.23  | 52.04   | 60.54 | 63.18  | 64.9   | 92.3    | 67.89  | 46.36 | 44.98  |
| 59.96             | 98.9   | 49.5  | 66.1   | 73.32   | 100.9 | 91.8   | 98.42  | 123.02  | 71.59  | 37.94 | 54.6   |
| 67.96             | 83.1   | 32.76 | 100.3  | 37.76   | 59.26 | 72.28  | 58.9   | 58.76   | 77.6   | 51.4  | 53.78  |
| 66.62             | 100.45 | 72.97 | 81.3   | 71.46   | 58.36 | 65.06  | 73.98  | 63.3    | 25.1   | 45.26 | 47.16  |
| 86.56             | 77.8   | 80.92 | 80.82  | 56.78   | 60.01 | 86.4   | 30.25  | 82.16   | 95.9   | 45.92 | 40.35  |
| 71.5              | 68.1   | 64.21 | 36.2   | 98.8    | 94.7  | 74.7   | 62.7   | 61      | 89     | 46.64 | 50.9   |
| 74.3              | 65.9   | 60.11 | 150.1  | 49.86   | 56.4  | 79.3   | 46.2   | 59.64   | 70.3   | 49.16 | 51.9   |
|                   |        | 74.23 |        | 39.2    | 84.6  |        |        | 68.3    |        |       |        |
|                   |        |       |        |         |       |        |        | 68.18   |        |       |        |
|                   |        |       |        |         |       |        |        |         |        |       |        |

**Suppl. Table S4, (A)** Velocity (um/sec) of freely moving worms of three different ages (Control: untreated animals, VitC: worms grown at the presence of 1mM vitamin C, PQ: worms grown in the presence of 0.1mM PQ, VitC/PQ: worms grown in the simultaneous presence of both 1mM vitamin C and 0.1mM PQ, L4 animals are considered as Day 0 worms). 18-22 worms were tracked from each studied group.

SUPPL. TABLE 4, Locomotion Parameters Data, (B) Bending Amplitude

| BENDING AMPLITUDE (mm) |      |      |        |         |      |      |        |         |      |      |        |
|------------------------|------|------|--------|---------|------|------|--------|---------|------|------|--------|
| Day1                   |      |      |        | Day4    |      |      |        | Day5    |      |      |        |
| Control                | VitC | PQ   | VitCPQ | Control | VitC | PQ   | VitCPQ | Control | VitC | PQ   | VitCPQ |
| 0.07                   | 0.12 | 0.08 | 0.08   | 0.13    | 0.09 | 0.09 | 0.09   | 0.11    | 0.09 | 0.11 | 0.09   |
| 0.09                   | 0.14 | 0.08 | 0.1    | 0.11    | 0.11 | 0.08 | 0.21   | 0.12    | 0.07 | 0.11 | 0.12   |
| 0.08                   | 0.11 | 0.09 | 0.12   | 0.15    | 0.11 | 0.1  | 0.08   | 0.13    | 0.08 | 0.07 | 0.07   |
| 0.08                   | 0.11 | 0.08 | 0.12   | 0.11    | 0.1  | 0.11 | 0.11   | 0.19    | 0.09 | 0.1  | 0.09   |
| 0.08                   | 0.52 | 0.08 | 0.08   | 0.11    | 0.11 | 0.08 | 0.12   | 0.07    | 0.09 | 0.08 | 0.08   |
| 0.08                   | 0.09 | 0.08 | 0.07   | 0.13    | 0.12 | 0.12 | 0.1    | 0.09    | 0.07 | 0.11 | 0.09   |
| 0.08                   | 0.12 | 0.14 | 0.11   | 0.12    | 0.09 | 0.1  | 0.1    | 0.08    | 0.1  | 0.11 | 0.09   |
| 0.08                   | 0.13 | 0.08 | 0.09   | 0.11    | 0.08 | 0.14 | 0.11   | 0.08    | 0.09 | 0.11 | 0.07   |
| 0.1                    | 0.05 | 0.13 | 0.08   | 0.13    | 0.07 | 0.1  | 0.08   | 0.09    | 0.08 | 0.14 | 0.11   |
| 0.11                   | 0.15 | 0.1  | 0.07   | 0.12    | 0.08 | 0.15 | 0.09   | 0.11    | 0.09 | 0.09 | 0.13   |
| 0.14                   | 0.67 | 0.11 | 0.06   | 0.09    | 0.08 | 0.14 | 0.09   | 0.24    | 0.09 | 0.11 | 0.09   |
| 0.14                   | 0.11 | 0.09 | 0.08   | 0.1     | 0.09 | 0.09 | 0.01   | 0.19    | 0.07 | 0.09 | 0.12   |
| 0.14                   | 0.12 | 0.17 | 0.1    | 0.08    | 0.07 | 0.08 | 0.11   | 0.08    | 0.08 | 0.12 | 0.07   |
| 0.12                   | 0.11 | 0.19 | 0.09   | 0.07    | 0.09 | 0.11 | 0.11   | 0.1     | 0.09 | 0.1  | 0.09   |
| 0.11                   | 0.15 | 0.1  | 0.1    | 0.09    | 0.08 | 0.09 | 0.09   | 0.1     | 0.09 | 0.11 | 0.09   |
| 0.13                   | 0.14 | 0.1  | 0.09   | 0.13    | 0.09 | 0.11 | 0.1    | 0.13    | 0.07 | 0.07 | 0.09   |
| 0.09                   | 0.1  | 0.11 | 0.1    | 0.17    | 0.1  | 0.09 | 0.1    | 0.13    | 0.1  | 0.11 | 0.12   |
| 0.1                    | 0.08 | 0.09 | 0.1    | 0.11    | 0.08 | 0.07 | 0.11   | 0.14    | 0.09 | 0.12 | 0.09   |
|                        |      |      |        | 0.15    |      |      |        | 0.11    |      | 0.1  |        |
|                        |      |      |        | 0.01    |      |      |        | 0.11    |      |      |        |
|                        |      |      |        | 0.12    |      |      |        | 0.09    |      |      |        |
|                        |      |      |        |         |      |      |        |         |      |      |        |

**Suppl. Table S4, (B):** Bending amplitude (mm) of freely moving worms of three different ages (Control: untreated animals, VitC: worms grown at the presence of 1mM vitamin C, PQ: worms grown at the presence of 0.1 mM PQ, VitC/PQ: worms grown in the simultaneous presence of 1 mM vitamin C and 0.1 mM PQ, L4 animals are considered as Day 0 worms). 18-22 worms were tracked from each studied group.
